# Supplementary material for: MicroRNA393 is involved in nitrogen-promoted rice tillering through regulation of auxin signal transduction in axillary buds
Source: PubMed Central journal article supplement (PMC5004122; doi:10.1038/srep32158), 2016-08-30
Supplement: srep32158-s1.pdf [file srep32158-s1.pdf]

## **Supplementary information**

### **MicroRNA393 is involved in nitrogen-promoted rice tillering through regulation of auxin signal transduction in axillary buds**

**Xiang Li<sup>1</sup>, Kuaifei Xia<sup>1</sup>, Zhen Liang<sup>2</sup>, Kunling Chen<sup>2</sup>, Caixia Gao<sup>2</sup> & Mingyong Zhang<sup>1\*</sup>**

<sup>1</sup>Key Laboratory of South China Agricultural Plant Molecular Analysis and Genetic Improvement & Guangdong Provincial Key Laboratory of Applied Botany, South China Botanical Garden, Chinese Academy of Sciences, Guangzhou 510650, China. <sup>2</sup>State Key Laboratory of Plant Cell and Chromosome Engineering, Institute of Genetics and Developmental Biology, Chinese Academy of Sciences, Beijing 100101, China. Correspondence and requests for materials should be addressed to M.Y. (email: zhangmy@scbg.ac.cn)

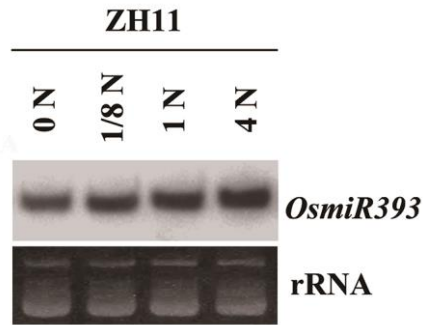

**Figure S1. Supply of  $\text{NH}_4\text{NO}_3$  triggered *OsmiR393* accumulation.** Small RNA gel blot analysis of *OsmiR393* expression level in ZH11 under elevated  $\text{NH}_4\text{NO}_3$  levels.

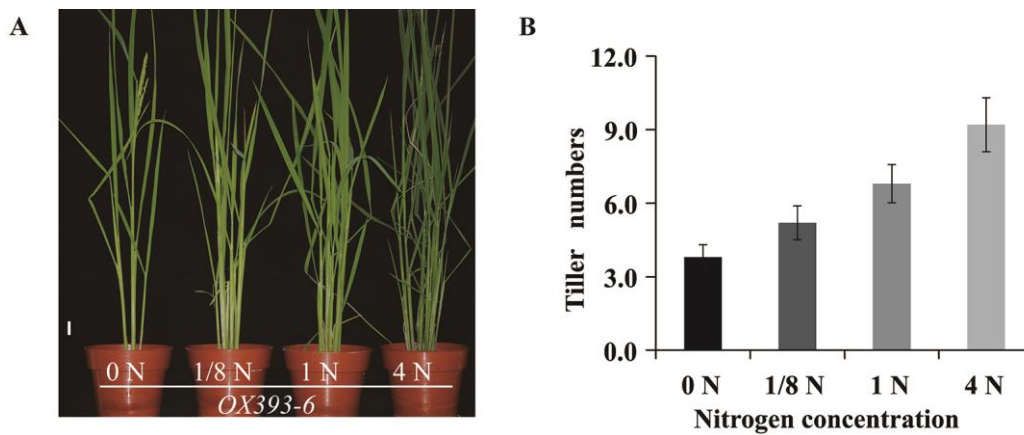

**Figure S2. *OsmiR393* overexpressing line (*Ox393-6*) treated with  $\text{NH}_4\text{NO}_3$ , exhibit increased tiller number, which is not to the extent of ZH11 in Fig. 1. B-C, Tillers of *Ox393-6* treated with gradient  $\text{NH}_4\text{NO}_3$  concentrations. Bar = 3 cm. B, Statistical analysis of (A) by *t*-test, Vertical bars indicate standard error deviation. Three individual repeats were performed.**

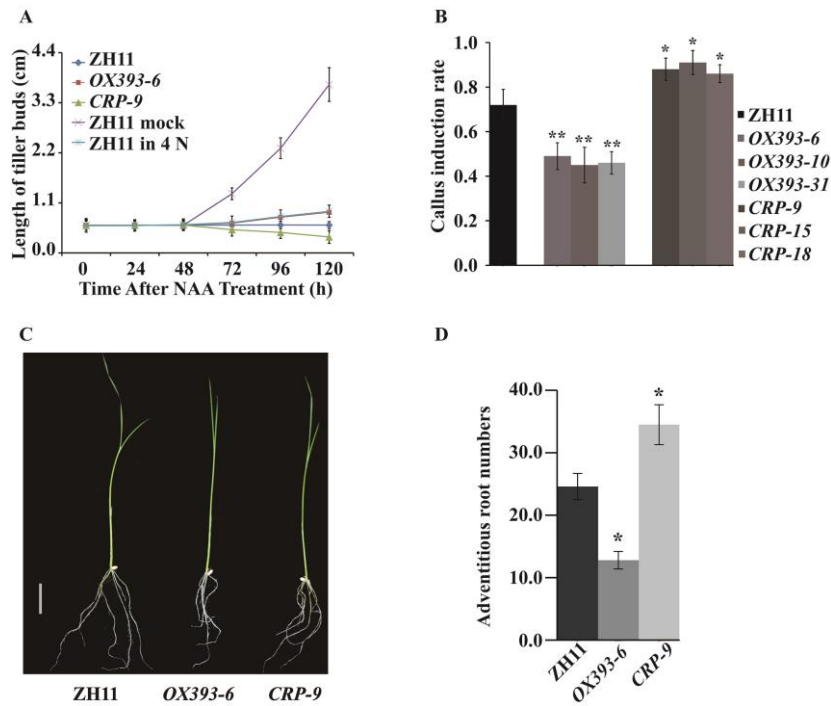

**Figure S3. OsmiR393 involved in auxin signaling transduction.**

**A**, Effect of NAA treatment on the outgrowth of rice tiller buds at the third leaf axils. Error bars represent mean  $\pm$  standard error ( $n = 20$ ). The NAA spray concentration is  $5 \text{ mg L}^{-1}$ . **B**, Callus induction rate from seeds of ZH11, OsmiR393-overexpressing lines (OX393), and *OsMIR393* knock-out mutants (CRP) with  $2 \text{ mg L}^{-1}$  NAA. **C**, Root architecture of ZH11, OX393-6, and CRP-9 under 1 N level. Bar = 3 cm. **D**, Statistical analysis of adventitious root numbers in ZH11, OX393-6, and CRP-9. Eighteen 7-day-old seedlings of each line were used for adventitious roots number counting. The error bar represents mean  $\pm$  SE. The asterisk indicates significant differences ( $* P \leq 0.05$  and  $** P \leq 0.01$ ) compared with ZH11 by *t*-test.

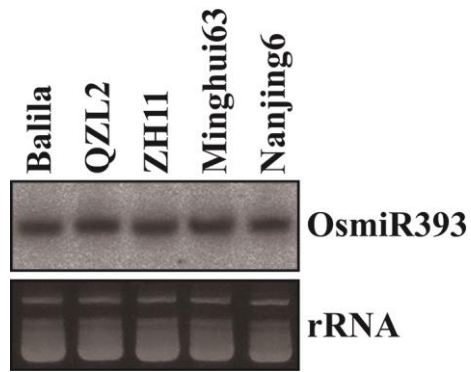

**Figure S4. OsmiR393 expression level in N less-responsive and highly sensitive rice varieties.** A small RNA gel blot assay was performed to detect OsmiR393 expression in N less-responsive varieties (ZH11, QZL2, and Balila), and in highly sensitive varieties (Minghui 63 and Nanjing 6). The total rRNA was used as a loading control.

**Supplementary Table S1** Primer sequences used in this study

| Name          | Sequence (5' - 3')                               |
|---------------|--------------------------------------------------|
| 393-q-F       | GACTGTCCAAAGGGATCGCATT                           |
| 393-q-R       | GTGCAGGGTCCGAGGTATTC                             |
| Actin-q-F     | CGGTGTCATGGTCGGAAT                               |
| Actin-q-R     | GCTCGTTGTAGAAGGTGT                               |
| U6 q-F        | CGATAAAATTGGAACGATACAGA                          |
| U6 q-R        | ATTTGGACCATTCTCGATTTGT                           |
| U6-RT         | ATTTGGACCATTCTCGATTTGT                           |
| OsAFB2- q-F   | GAGCGGGATGGTAGCAATGAAATG                         |
| OsAFB2- q-R   | CCGAGATAAGGGAGGCACACCAAC                         |
| OsTIR1-q-F    | TCCAGGTGCTCCGCCTCGTCTCCT                         |
| OsTIR1-q-R    | CCGGGAAGAGGCTGAGCCAATGAA                         |
| 393-RT        | GTCGTATCCAGTGCAGGGTCCGAGGTATTTCGCACTGGATACGACGAT |
| 36080-q-F     | TCAAGGAGGACCAGCAGTTCACCA                         |
| 36080-q-R     | GAGGACACCCGTGCTGACCAAAGT                         |
| 41010-q-F     | GCGGAGGTGGAGGCGGGAAGG                            |
| 41010-q-R     | CGCGAGGGAGACGAGGTGGTTG                           |
| 39790-q-F     | TATGGTATGCCCGGTGGAAGAAGT                         |
| 39790-q-R     | ATACTGCTGCCTCAGGATGATTGG                         |
| 52320-q-F     | TGCTTCCCCTACCACCGTCACCAC                         |
| 52320-q-R     | GCGCACTCTTCCACCTTCCCATTG                         |
| 58734-q-F     | TTGCTTCCGCCTCCTCATCTTCCT                         |
| 58734-q-R     | GCCGTGCGAACCATATTCCTTTGA                         |
| 393 probe     | GATCAATGCGATCCCTTTGGA                            |
| CRISPR-F      | GGCAAAGGATCAATGCGATCCCTT                         |
| CRISPR-R      | AAACAAGGGATCGCATTGATCCTT                         |
| CRISPR-g-F    | CCTCACCAAATAACGAAAGAG                            |
| CRISPR-g-R    | CAGTCACGACGTTGTAAAAC                             |
| cMYC-TIR1-F   | GGATCC ATGGGGCGCGGCGGCTCGCG                      |
| MYC-TIR1-R    | GGTACC CTAGAGTCCATGCATTTCCA                      |
| cMYC-OsIAA6-F | GGATCC ATGGAAGAAGGGTCCAACAA                      |
| cMYC-OsIAA6-R | GCGGCCGC GACCCTAGCAGTAGCTCCAA                    |

**Supplementary Table S2** Statistical analysis data of axillary meristem between ZH11 and *OX393-6*

|                | 0 N<br>(NAM/TP) | 1 N<br>(NAM/TP) | 4 N (NAM/TP) | 8 N (NAM/TP) |
|----------------|-----------------|-----------------|--------------|--------------|
| ZH11           | 2/20            | 9/20            | 17/20        | 20/20        |
| <i>OX393-6</i> | /               | 13/20           | /            | /            |

ZH11 and *OX393-6* were sown and cultivated in hydroponic solution according to IRRI nutrient solution<sup>38</sup> under various levels of NH<sub>4</sub>NO<sub>3</sub> fertilizer treatment whereas *OX393-6* was under normal (1 N) NH<sub>4</sub>NO<sub>3</sub> fertilizer concentration. After 14 days, 20 samples were sectioned to observe axillary meristems both in ZH11 and in *OX393-6*. NAM: observed numbers of axillary meristem, TP: total plants sampled.
